# Supplementary material
Source: Springer Nature journal article supplement (https://www.springermedizin.de/resource/supplementary/12943_2012_1165_MOESM6_ESM.pdf/9552548)

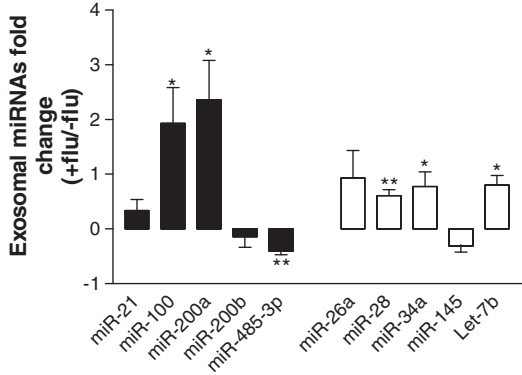

**A**

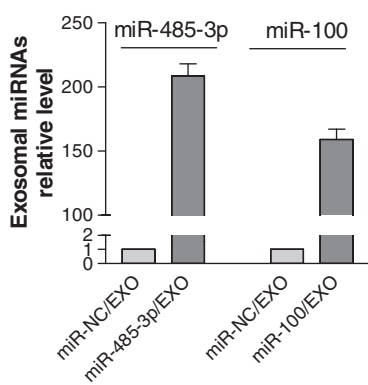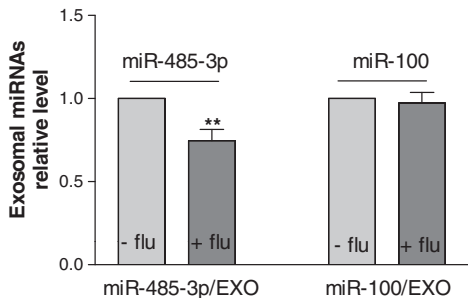

**B**

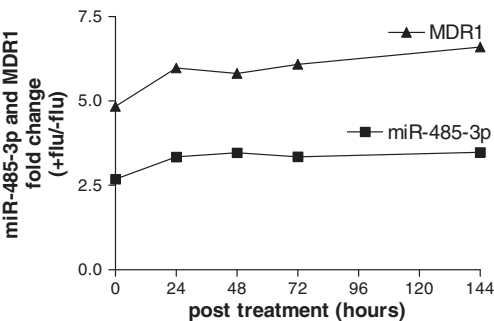

**D**

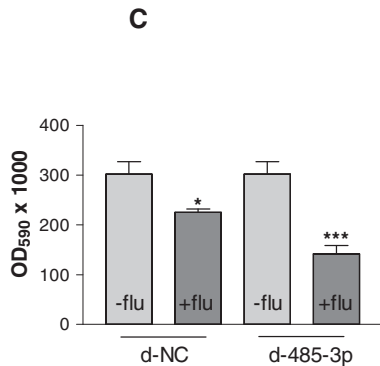

**E**

Supplement: MOESM6 [file 9552548]
